# Supplementary material
Source: publisher figshare collection journal article supplement (https://acs.figshare.com/ndownloader/files/5681292)
Supplement: Supplementary file 1 [file 5681292]

### Supporting information

1. **Figure 1** shows the time-course of the fabrication of mercapto-functionalized hemisphere.
2. **Figure 2** indicates that aggregation of hemispheres was not observed by measuring the particle size distribution.
3. **Figure 3** indicates how the morphology would be varied by the pyrolysis at 900°C.
4. **Figure 4** shows that the second weight loss of hemispheres increases as the amount of  $\text{RSiO}_{3/2}$  and  $\text{RSi(OH)O}_{2/2}$  units formed by GTS increases.
5. **Figure 5** indicates SEM images of microstructures patterned by compression micromolding using a rigid structure on the mold rather than an elastometric one.
6. **Figure 6** shows SEM images of microstructure fabricated by curable compression micromolding and curable cast micromolding using the thin-layer materials as a master.
7. **Table 1** indicates the recipes for polymerization of particles **1 – 10** described in **Figures 1, 2, 4, 5** and **6**.

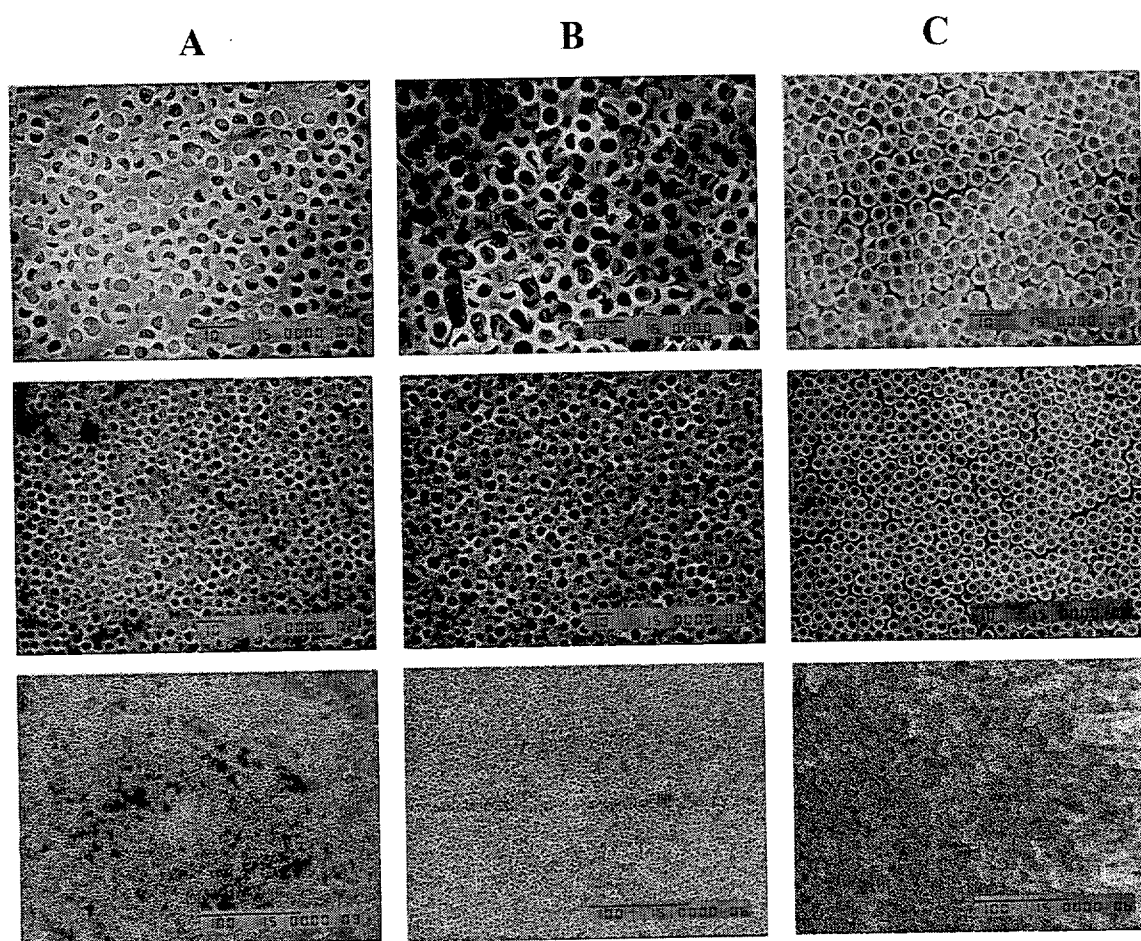

**Figure 1.** The time-course of the fabrication of mercapto-functionalized hemisphere **10** with an average major axis of  $5.0\ \mu\text{m}$ . The thin-layer materials were obtained by casting a colloid solution of the particles on the metal at regular time intervals. (A) SEM images after a period of approximately 10 hr. (B) after approximately 24 hr. (C) after about 36 hr.

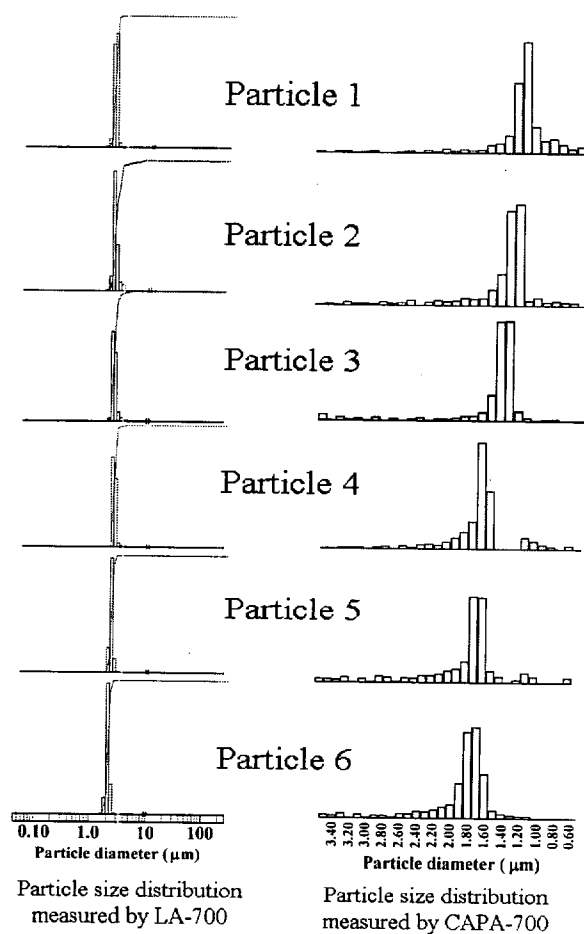

**Figure 2.** Particle size distribution of organic-functionalized hollow hemispheres 1 – 6 of methylsilsesquioxane derivatives obtained by suspension polymerization were measured by LA-700 and CAPA-700, respectively.

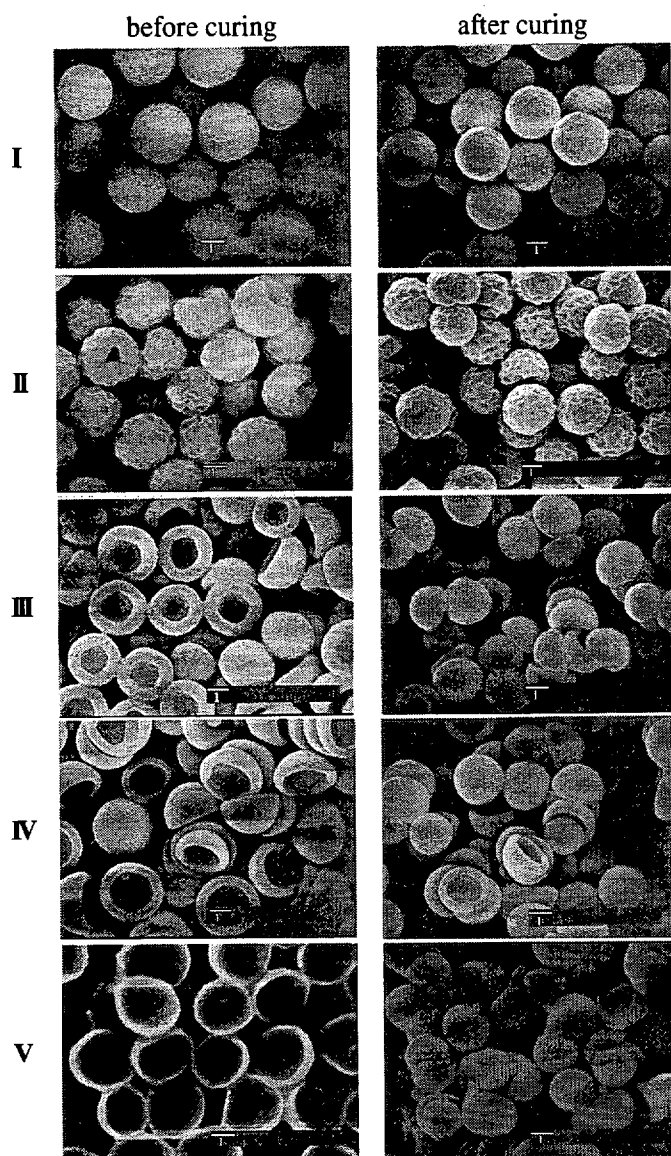

**Figure 3.** SEM images of methylsilsesquioxane derivatives upon curing at 900 °C under nitrogen atmosphere. All photographs enlarged  $\times 10000$  times. The marker bars are 1.0  $\mu\text{m}$ . Empirical formulas of particles I - V were,  $\text{R}_{0.9}\text{SiO}_{1.55}$ ,  $\text{R}_{0.8}\text{SiO}_{1.60}$ ,  $\text{R}_{0.7}\text{SiO}_{1.65}$ ,  $\text{R}_{0.6}\text{SiO}_{1.70}$ , and  $\text{R}_{0.5}\text{SiO}_{1.75}$ , respectively.

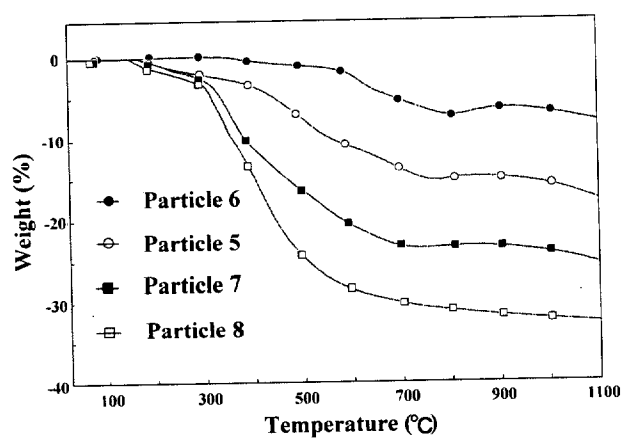

**Figure 4.** TGA curves of particles 5, 7, and 8 compared with hemisphere 6.

**Scheme 1. Soft- and hard-compression micromolding**

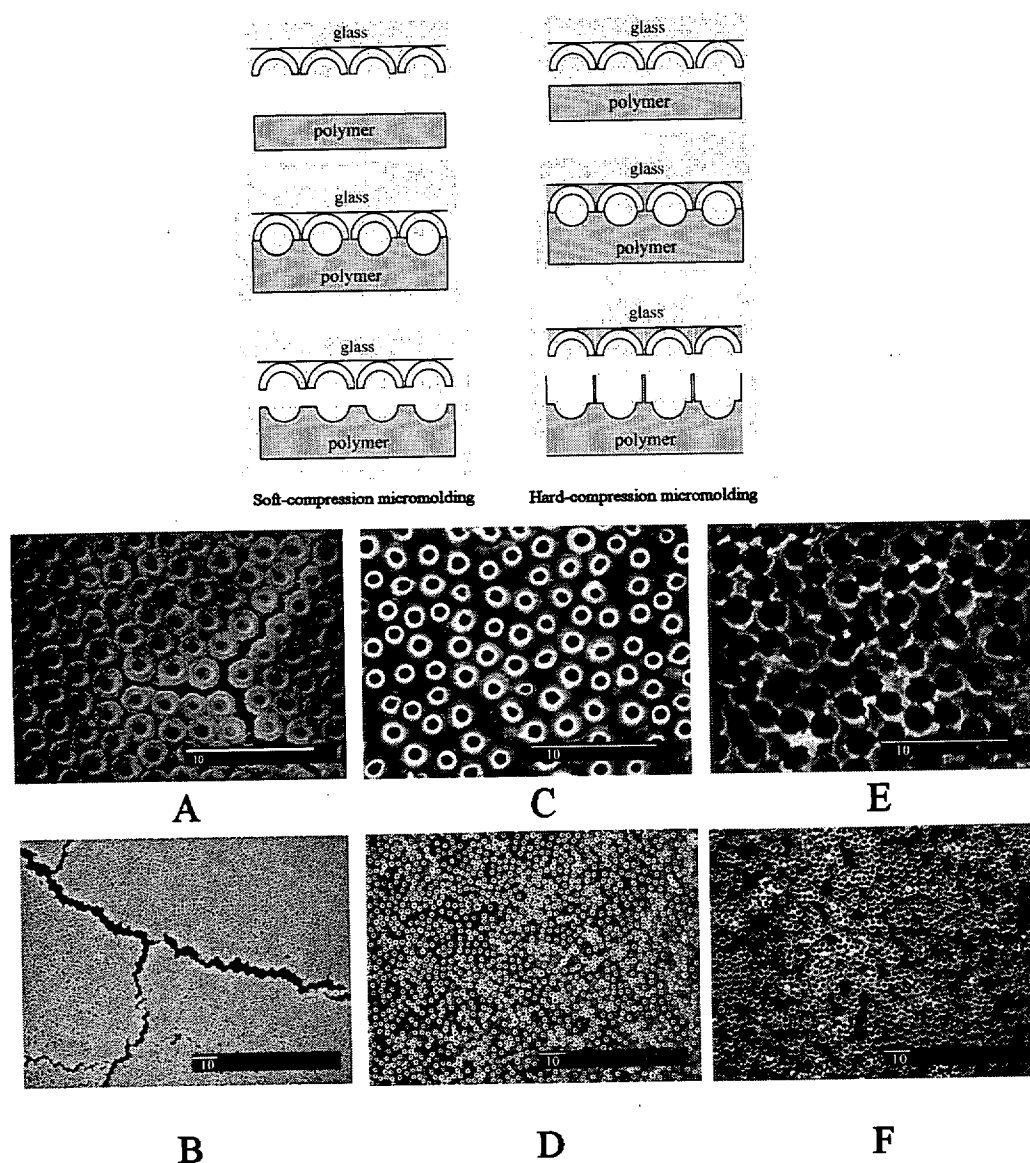

**Figure 5.** SEM images of nanostructure of hemisphere 1 on a master, polycarbonate replicas prepared by soft-compress and hard-compress micromolding, as shown in Scheme 1. (A, B) The thin-layer material as a rigid structure on the master rather than an elastometric one. (C, D) polycarbonate replica patterned by soft-compress micromolding. (E, F) polycarbonate replica embossed by hard-compress micromolding.

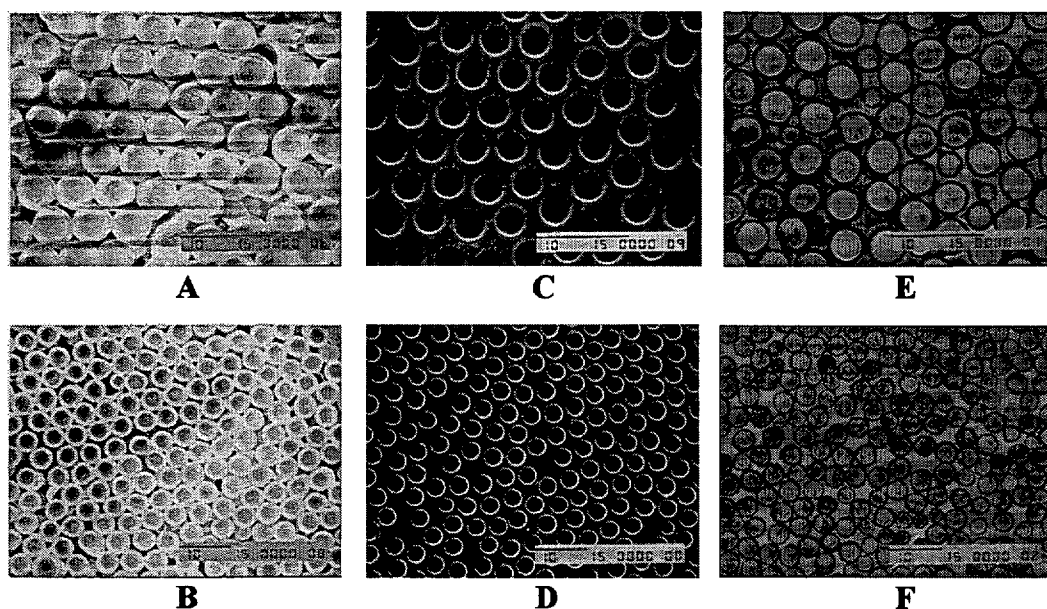

**Figure 6.** SEM images of microstructures of hemisphere **10** with an average major axis of 5.0  $\mu\text{m}$  on a master, polymer replica fabricated by curable compression micromolding, and polymer replica obtained by curable cast micromolding. (A, B) The thin-layer material on a glass. (C, D) The replica of poly(4-acryloylmorpholine) obtained by curable compression micromolding. (E, F) The replica of poly(4-acryloylmorpholine) patterned by curable cast micromolding.

**Table 1. Particles 1–10 Prepared by Polymerization under Constant Concentration of NaOH (0.020wt % per water)**

| particle             | MTS<br>(mol) | TOES<br>(mol) | GTS<br>(mol) | MATS<br>(mol) | MCTS<br>(mol) | median diameter (μm) |          |
|----------------------|--------------|---------------|--------------|---------------|---------------|----------------------|----------|
|                      |              |               |              |               |               | LA-700               | CAPA-700 |
| <b>1</b>             | 0.43         | 0.38          |              | 0.032         |               | 2.14                 | 1.18     |
| <b>2</b>             | 0.43         | 0.38          | 0.034        |               |               | 2.25                 | 1.34     |
| <b>3</b>             | 0.57         | 0.38          |              |               |               | 2.25                 | 1.44     |
| <b>4</b>             | 0.52         | 0.29          |              | 0.032         |               | 2.11                 | 1.64     |
| <b>5<sup>a</sup></b> | 0.52         | 0.29          | 0.034        |               |               | 2.18                 | 1.68     |
| <b>6</b>             | 0.67         | 0.29          |              |               |               | 2.13                 | 1.72     |
| <b>7</b>             | 0.43         | 0.29          | 0.069        |               |               | 2.43                 | 1.99     |
| <b>8</b>             | 0.35         | 0.29          | 0.104        |               |               | 2.21                 | 1.71     |
| <b>9<sup>a</sup></b> | 0.43         | 0.38          |              |               | 0.046         | 2.41                 | 1.64     |
| <b>10</b>            | 0.43         | 0.38          |              |               | 0.046         | 5.02                 | 3.76     |

<sup>a</sup>Particle 5 and 9 correspond to particles 8 and 10 in this report, respectively. <sup>b</sup>Particle 10 was obtained by polymerization using sodium hydroxide (0.0069 wt % per water).
